# Supplementary material
Source: publisher figshare collection journal article supplement (https://diabetesjournals.figshare.com/articles/dataset/_/24438706)
Supplement: Supplementary file 2 [file 1]

Supplemental Table S2. Distribution of participants per centre and description of the centres.

| Hospital                           | n all | n<br>MM780G | n<br>Control IQ | T1D n | AHCL<br>n | AHCL<br>% |
|------------------------------------|-------|-------------|-----------------|-------|-----------|-----------|
| H Badajoz‡                         | 25    | 25          | 0               | 1000  | 350       | 35        |
| H Ciudad Real                      | 25    | 0           | 25              | 700   | 160       | 23        |
| H Mutua de Terrassa, Barcelona     | 17    | 3           | 14              | 600   | 100       | 17        |
| H Virgen del Rocío, Sevilla        | 13    | 7           | 6               | 3000  | 225       | 8         |
| H Ramon y Cajal, Madrid            | 12    | 6           | 6               | 2000  | 350       | 18        |
| H Virgen de la Victoria, Málaga    | 11    | 3           | 8               | 3000  | 60        | 2         |
| H Virgen Macarena, Sevilla         | 10    | 4           | 6               | 1800  | 110       | 6         |
| H Clinic, Barcelona‡               | 8     | 8           | 0               | 2100  | 226       | 11        |
| H Sant Pau, Barcelona              | 7     | 0           | 7               | 1200  | 205       | 17        |
| H Germans Trias i Pujol, Barcelona | 7     | 7           | 0               | 800   | 125       | 16        |
| H del Mar, Barcelona‡              | 5     | 5           | 0               | 600   | 100       | 17        |
| H Infanta Sofía, Madrid            | 5     | 5           | 0               | 750   | 201       | 27        |
| H Reina Sofía, Cordoba             | 3     | 0           | 3               | 2100  | 30        | 1         |
| H Sant Joan de Déu, Barcelona‡     | 2     | 2           | 0               | 750   | 105       | 14        |

T1D (type 1 diabetes). AHCL (advanced hybrid closed-loop). ‡ Centres allowed to use only the MM780G system, by contractual agreements.
