# Supplementary material
Source: publisher figshare collection journal article supplement (https://diabetesjournals.figshare.com/articles/dataset/_/24438706)
Supplement: Supplementary file 3 [file 1]

Supplemental Table S1. Patient-reported outcomes. Questionnaire scores, general and subscales, at baseline and after three months of use of the two advanced hybrid closed-loop systems.

| Supplemental Table S1. Patient-reported outcomes. Questionnaire scores, general and subscales, at baseline and after three months of use of the two advanced hybrid closed-loop systems. |                |               |                  |               |               |                  |                |               |                  |                  |              |
|------------------------------------------------------------------------------------------------------------------------------------------------------------------------------------------|----------------|---------------|------------------|---------------|---------------|------------------|----------------|---------------|------------------|------------------|--------------|
|                                                                                                                                                                                          | All            |               |                  | MM780G        |               |                  | Control IQ     |               |                  |                  |              |
|                                                                                                                                                                                          | Baseline       | 3 months      | p                | Baseline      | 3 months      | p                | Baseline       | 3 months      | p                | P‡               | P¥           |
| HFS:                                                                                                                                                                                     | 78.78 ± 17.57  | 69.38 ± 18.72 | <b>&lt;0.001</b> | 76.50 ± 18.22 | 67.88 ± 18.66 | <b>&lt;0.001</b> | 81.07 ± 16.70  | 70.77 ± 18.80 | <b>&lt;0.001</b> | 0.116            | 0.530        |
| worry                                                                                                                                                                                    | 54.65 ± 15.09  | 47.36 ± 16.03 | <b>&lt;0.001</b> | 52.46 ± 15.58 | 46.40 ± 15.99 | <b>&lt;0.001</b> | 56.83 ± 14.36  | 48.32 ± 16.11 | <b>&lt;0.001</b> | 0.091            | 0.244        |
| hypoglycaemia avoidant behaviour                                                                                                                                                         | 17.15 ± 4.32   | 15.71 ± 3.44  | <b>&lt;0.001</b> | 17.15 ± 4.06  | 15.19 ± 3.72  | <b>0.001</b>     | 17.14 ± 4.60   | 16.22 ± 3.08  | 0.072            | 0.865            | 0.178        |
| hyperglycaemia influenced behaviour                                                                                                                                                      | 7.44 ± 3.29    | 6.20 ± 3.09   | <b>&lt;0.001</b> | 7.17 ± 3.56   | 6.28 ± 3.06   | 0.059            | 7.71 ± 3.00    | 6.12 ± 3.13   | <b>&lt;0.001</b> | 0.154            | 0.212        |
| DDS:                                                                                                                                                                                     | 2.74 ± 1.26    | 2.22 ± 1.07   | <b>&lt;0.001</b> | 2.25 ± 0.96   | 1.96 ± 0.90   | <b>0.001</b>     | 3.23 ± 1.34    | 2.47 ± 1.17   | <b>&lt;0.001</b> | <b>&lt;0.001</b> | <b>0.012</b> |
| emotional burden                                                                                                                                                                         | 3.32 ± 1.51    | 2.71 ± 1.19   | <b>&lt;0.001</b> | 2.94 ± 1.32   | 2.49 ± 1.14   | <b>0.004</b>     | 3.64 ± 1.60    | 2.90 ± 1.20   | <b>&lt;0.001</b> | <b>0.005</b>     | 0.251        |
| physician distress                                                                                                                                                                       | 2.27 ± 1.57    | 1.87 ± 1.36   | <b>0.003</b>     | 1.69 ± 1.29   | 1.57 ± 1.15   | 0.674            | 2.76 ± 1.63    | 2.12 ± 1.48   | <b>0.001</b>     | <b>&lt;0.001</b> | <b>0.037</b> |
| regimen distress                                                                                                                                                                         | 2.88 ± 1.39    | 2.26 ± 1.19   | <b>&lt;0.001</b> | 2.48 ± 1.10   | 2.06 ± 1.05   | <b>0.001</b>     | 3.21 ± 1.52    | 2.44 ± 1.27   | <b>&lt;0.001</b> | <b>0.003</b>     | 0.120        |
| interpersonal distress                                                                                                                                                                   | 2.40 ± 1.45    | 2.06 ± 1.29   | <b>0.002</b>     | 1.90 ± 1.29   | 1.74 ± 1.13   | 0.181            | 2.82 ± 1.45    | 2.32 ± 1.36   | <b>0.002</b>     | <b>&lt;0.001</b> | 0.098        |
| DQOL:                                                                                                                                                                                    | 100.27 ± 23.49 | 90.97 ± 22.86 | <b>&lt;0.001</b> | 96.30 ± 22.05 | 88.00 ± 19.93 | <b>&lt;0.001</b> | 104.59 ± 24.40 | 94.21 ± 25.44 | <b>&lt;0.001</b> | <b>0.047</b>     | 0.503        |
| satisfaction                                                                                                                                                                             | 37.82 ± 9.95   | 33.28 ± 9.63  | <b>&lt;0.001</b> | 36.77 ± 9.98  | 33.09 ± 9.52  | <b>&lt;0.001</b> | 38.97 ± 9.87   | 33.47 ± 9.80  | <b>&lt;0.001</b> | 0.214            | 0.215        |
| impact                                                                                                                                                                                   | 37.13 ± 10.43  | 34.23 ± 10.06 | <b>&lt;0.001</b> | 35.64 ± 9.76  | 32.72 ± 9.17  | <b>0.003</b>     | 38.76 ± 10.95  | 35.87 ± 10.78 | <b>0.002</b>     | 0.107            | 0.989        |
| worry: social                                                                                                                                                                            | 14.58 ± 5.27   | 13.54 ± 5.42  | <b>0.002</b>     | 13.69 ± 4.54  | 12.72 ± 4.01  | <b>0.012</b>     | 15.56 ± 5.83   | 14.44 ± 6.53  | <b>0.009</b>     | 0.086            | 0.830        |
| worry: diabetes                                                                                                                                                                          | 10.99 ± 3.31   | 9.80 ± 3.59   | <b>&lt;0.001</b> | 10.72 ± 3.14  | 9.34 ± 3.18   | <b>&lt;0.001</b> | 11.29 ± 3.47   | 10.31 ± 3.95  | <b>0.017</b>     | 0.398            | 0.461        |
| PSQI                                                                                                                                                                                     | 6.94 ± 4.06    | 6.06 ± 4.05   | <b>0.004</b>     | 6.52 ± 4.56   | 5.92 ± 4.32   | 0.215            | 7.35 ± 3.47    | 6.21 ± 3.78   | <b>0.019</b>     | 0.109            | 0.361        |
| > 5 (poor sleep quality) %                                                                                                                                                               | 57.4           | 46.3          | <b>0.019</b>     | 49.3          | 43.8          | 0.481            | 65.8           | 48.6          | <b>0.024</b>     | <b>0.043</b>     | 0.558        |
| GME:                                                                                                                                                                                     | 3.64 ± 0.52    | 3.68 ± 0.87   | 0.621            | 3.65 ± 0.44   | 3.74 ± 0.58   | 0.324            | 3.64 ± 0.59    | 3.62 ± 1.08   | 0.167            | 0.816            | 0.502        |
| convenience                                                                                                                                                                              | 3.81 ± 0.61    | 3.81 ± 0.91   | 0.899            | 3.79 ± 0.63   | 3.61 ± 0.76   | 0.198            | 3.83 ± 0.59    | 3.98 ± 0.99   | 0.357            | 0.871            | 0.062        |
| effectiveness                                                                                                                                                                            | 3.86 ± 0.86    | 4.24 ± 0.69   | <b>&lt;0.001</b> | 3.89 ± 0.87   | 4.20 ± 0.66   | <b>0.004</b>     | 3.83 ± 0.85    | 4.27 ± 0.72   | <b>0.001</b>     | 0.726            | 0.443        |
| intrusiveness                                                                                                                                                                            | 2.58 ± 0.82    | 2.64 ± 1.04   | 0.482            | 2.57 ± 0.78   | 2.48 ± 0.87   | 0.114            | 2.60 ± 0.86    | 2.79 ± 1.16   | 0.303            | 0.903            | 0.064        |
| INSPIRE                                                                                                                                                                                  | 70.84 ± 14.01  | 74.42 ± 15.15 | <b>0.032</b>     | 69.74 ± 12.59 | 74.00 ± 15.93 | 0.070            | 72.15 ± 15.53  | 74.92 ± 14.29 | 0.220            | 0.330            | 0.649        |
| Clarke score                                                                                                                                                                             | 2.27 ± 1.88    | 1.74 ± 1.60   | <b>&lt;0.001</b> | 2.07 ± 1.78   | 1.76 ± 1.70   | <b>0.023</b>     | 2.47 ± 1.96    | 1.72 ± 1.51   | <b>&lt;0.001</b> | 0.238            | <b>0.044</b> |

n = 150. HFS (Hypoglycaemia Fear Survey): lower scores indicating less fear of hypoglycemia. DDS (Diabetes Distress Scale): lower scores indicate less diabetes-related distress. DQoL (Diabetes Quality of Life): lower scores indicate a better quality of life. PSQI (Pittsburgh Sleep Quality Index): lower scores indicate better sleep quality. GME (Glucose Monitoring Experience Questionnaire): lower scores indicate less satisfaction with the monitoring system. INSPIRE (INSPIRE measures) lower scores indicate lower expectancies. > 90% questionnaire response. ‡p baseline MM780G vs. Control IQ. ¥p 3 months MM780G vs. Control IQ. Data are expressed as mean  $\pm$  standard deviation unless otherwise indicated.
