# Supplementary material
Source: publisher figshare collection journal article supplement (https://diabetesjournals.figshare.com/articles/dataset/_/24438706)
Supplement: Supplementary file 4 [file 1]

Supplemental Table S3. Time in different glycaemic ranges in the whole cohort and the Diabeloop users.

|                      | MM780G + Control-IQ n = 150 |              |         | Diabeloop n = 12 |               |       |
|----------------------|-----------------------------|--------------|---------|------------------|---------------|-------|
|                      | Baseline                    | 3 months     | p       | Baseline         | 3 months      | p     |
| TIR 70-180 mg/dl (%) | 61.53 ± 14.01               | 76.17 ± 9.48 | < 0.001 | 64.51 ± 18.86    | 75.17 ± 11.80 | 0.026 |
| Time > 180 mg/dl (%) | 33.72 ± 15.44               | 21.93 ± 9.65 | < 0.001 | 24.48 ± 13.61    | 20.68 ± 8.68  | 0.221 |
| Time > 250 mg/dl (%) | 9.76 ± 10.04                | 4.47 ± 4.30  | < 0.001 | 10.81 ± 9.94     | 6.18 ± 5.90   | 0.146 |
| Time < 70 mg/dl (%)  | 4.41 ± 4.24                 | 1.97 ± 1.67  | < 0.001 | 3.22 ± 3.26      | 1.09 ± 0.88   | 0.070 |
| Time < 54 mg/dl (%)  | 0.84 ± 1.27                 | 0.26 ± 0.53  | < 0.001 | 0.15 ± 0.3       | 0.22 ± 0.37   | 0.638 |

\*The Diabeloop cohort was excluded from the whole cohort analysis and the comparison between AHCL systems.
